# Supplementary material for: A highly processive topoisomerase I: studies at the single-molecule level
Source: PubMed Central journal article supplement — Nucleic Acids Res. 2014 May 31;42(12):7935–46. doi: 10.1093/nar/gku494 (PMC4081095; doi:10.1093/nar/gku494), 2014-05-31
Supplement: supp_gku494_nar-00428-f-2014-File009.pdf [file supp_gku494_nar-00428-f-2014-File009.pdf]

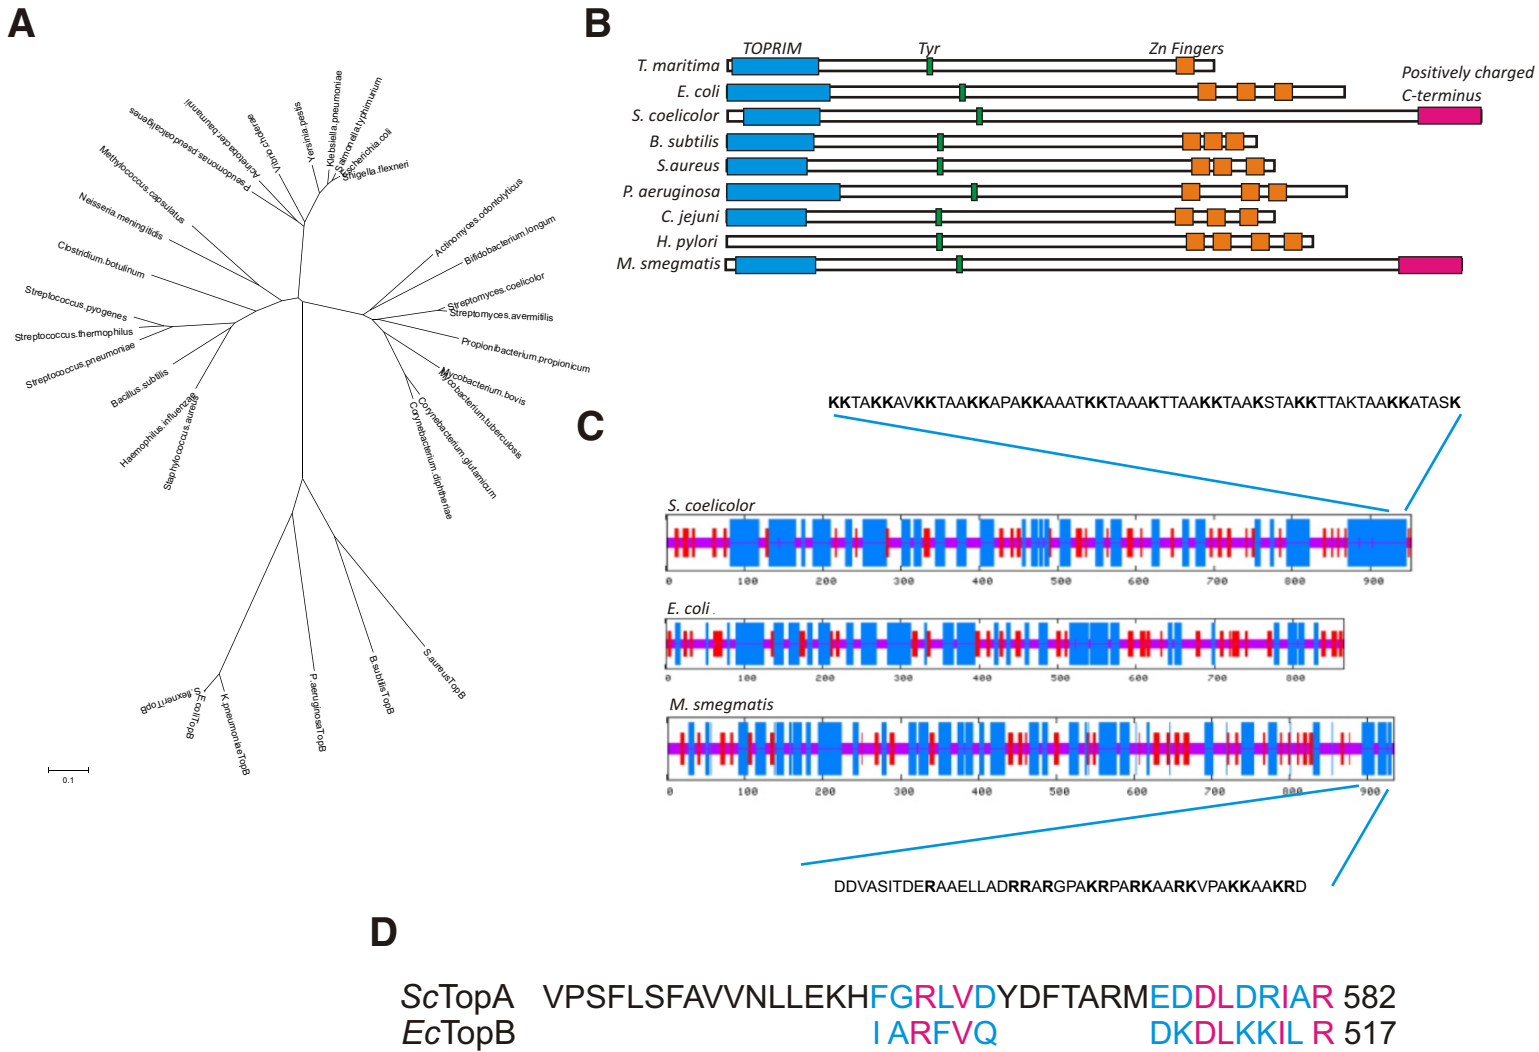

**Fig. S1** (A) Phylogenetic tree of bacterial TopA and TopB proteins. (B) Comparison of the domain organisation of bacterial TopA proteins. Conservative TOPRIM (blue) region and catalytic tyrosine residues (green) are indicated. The C-terminal domain is highly variable and contains different numbers of Zn-finger motifs (orange) or the stretch of positively charged amino acids (pink). (C) Secondary structure prediction for *ScTopA*, *MsTopA* and *EcTopA* with SOPMA algorithm reveals the presence of putative alpha-helix at C-terminal end of *ScTopA* and *MsTopA* rich in lysine and alanine residues. (D) Comparison of *EcTopB* region containing the decatenation loop with corresponding *ScTopA* region reveals the presence of conserved residues in *ScTopA* (pink - identical residues, blue - highly similar residues) separated with amino acids not present in *EcTopA*.

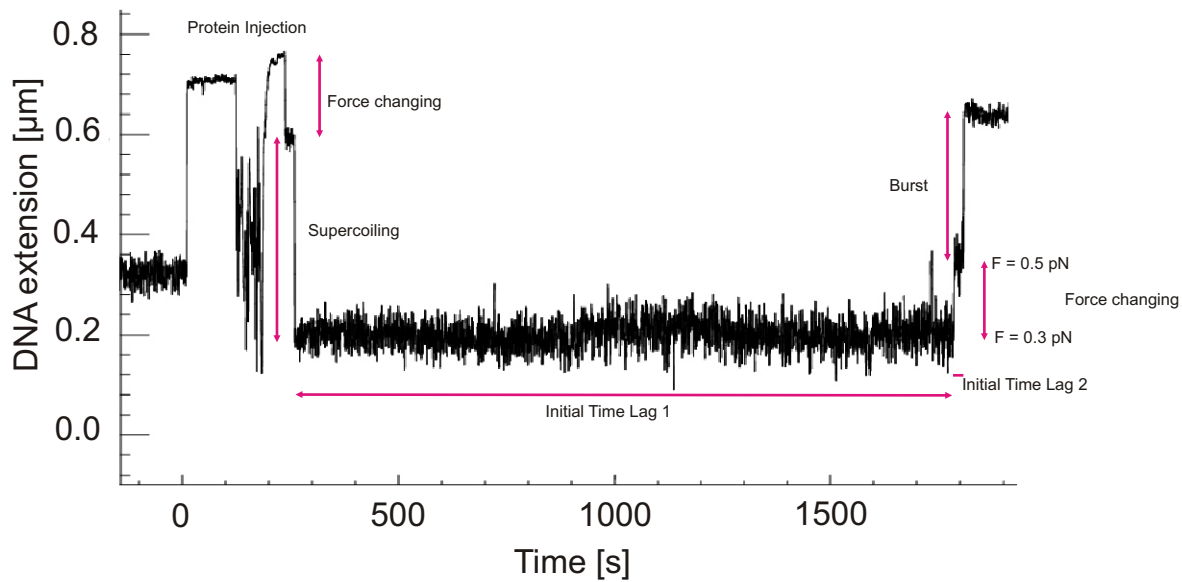

**Fig. S2** Relaxation of negatively supercoiled 2-kb DNA in a single-molecule experiment at two stretching forces ( $F = 0.3$  and  $0.5$  pN). The supercoiled DNA in the presence of  $5$  nM TopA at low stretching forces remained intact for  $1000$  sec (Initial Time Lag 1). After changing the stretching force the same DNA molecule was completely relaxed in short time (Initial Time Lag 2) in a single burst.

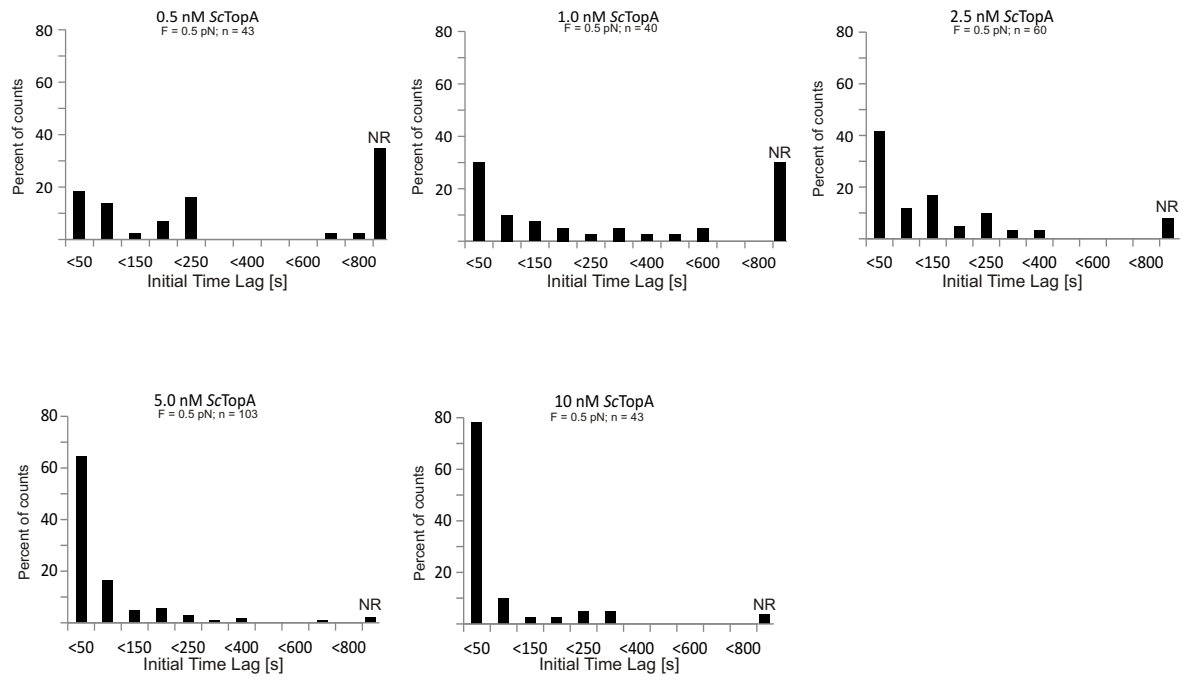

**Fig. S3** Distribution of initial time lags (ITL) and non relaxed beads (NR) measured under different *ScTopA* concentrations and used for plotting  $1/\text{ITL}$  versus *ScTopA* concentration.

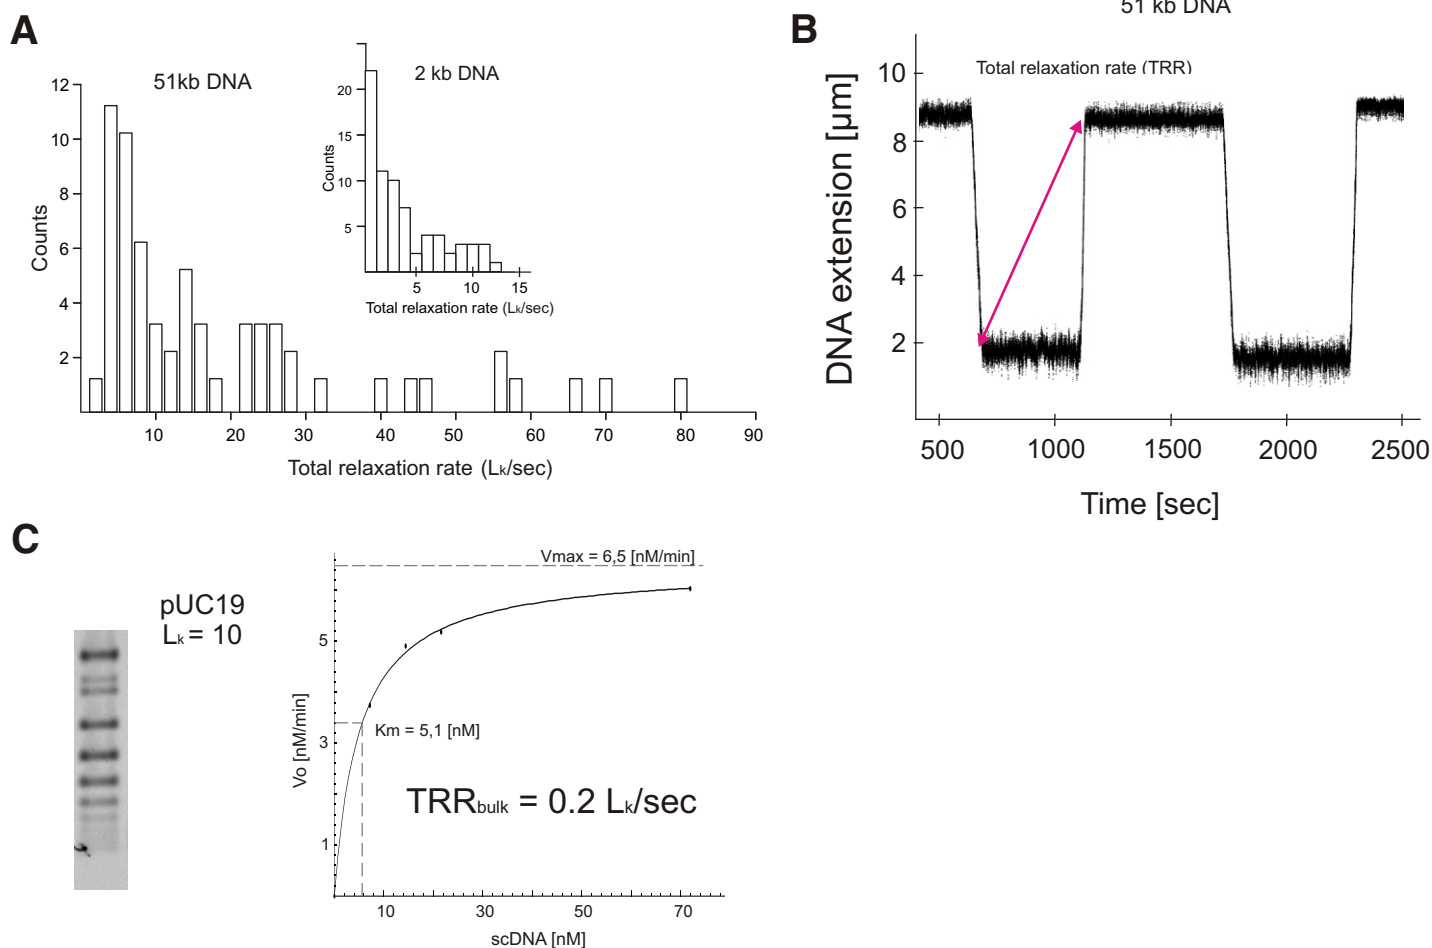

**Fig. S4** ScTopA relaxes DNA with comparable velocities (0.1-0.4 Lk/sec) independently of substrate length. Total relaxation rates (TRRs) calculated for two DNA substrates 51-kb (A) and 2-kb (inset), respectively. The typical record used to estimate TRR value (B).  $\text{TRR}_{\text{bulk}}$  (total relaxation rate for bulk experiment) value estimated based on fitting to the Michaelis-Menten equation is 0.2 Lk/sec for negatively supercoiled ( $L_k = 10$ ) pUC19 plasmid as a substrate.

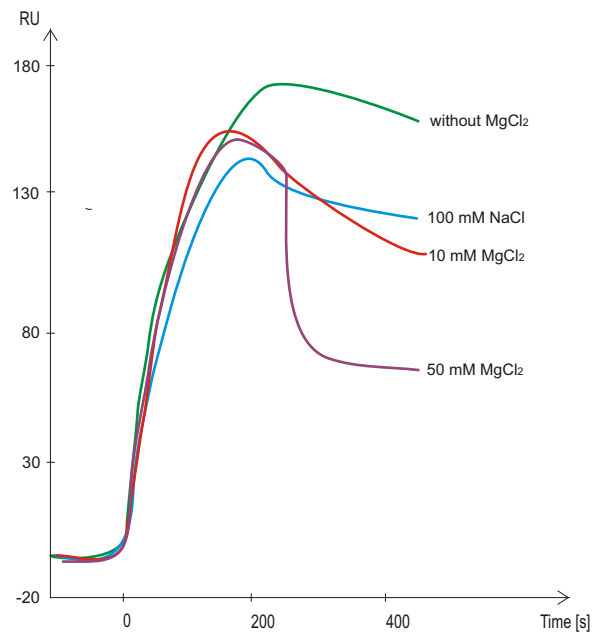

**Fig. S5** Binding of *ScTopA* to double-stranded DNA (dsDNA) observed using surface plasmon resonance (SPR). *ScTopA* binds to dsDNA in phosphate buffer (green). Addition magnesium ions to phosphate buffer triggers *ScTopA* dissociation (red and magenta). In control experiment the ion strength was increased by addition of 100 mM (blue) however the dissociation remained weak. In the experiment the *ScTopA* protein (80 nM in 25mM NaH<sub>2</sub>PO<sub>4</sub> pH 8.0 and 150mM NaCl) was bound to the biotinylated 350-bp *S. coelicolor* DNA fragment immobilized on the chip surface.

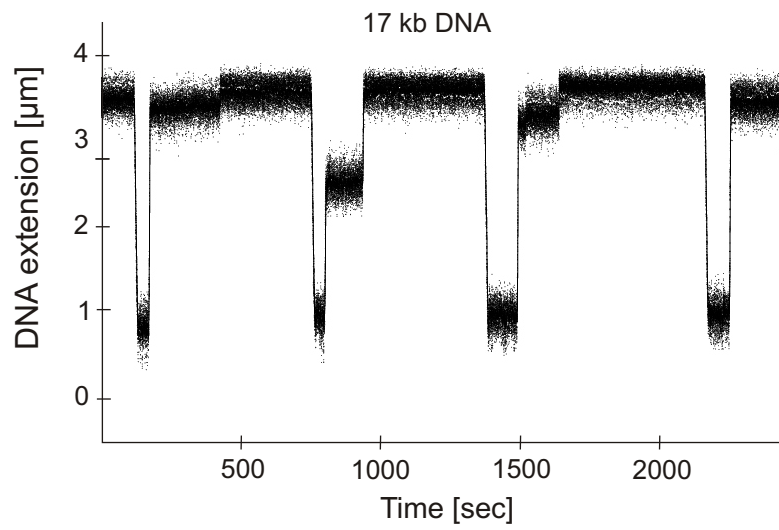

**Fig. S6** The real-time record obtained for 17-kb DNA shows the relaxation of negatively supercoiled DNA in highly processive bursts (1-3) at single-molecule level.

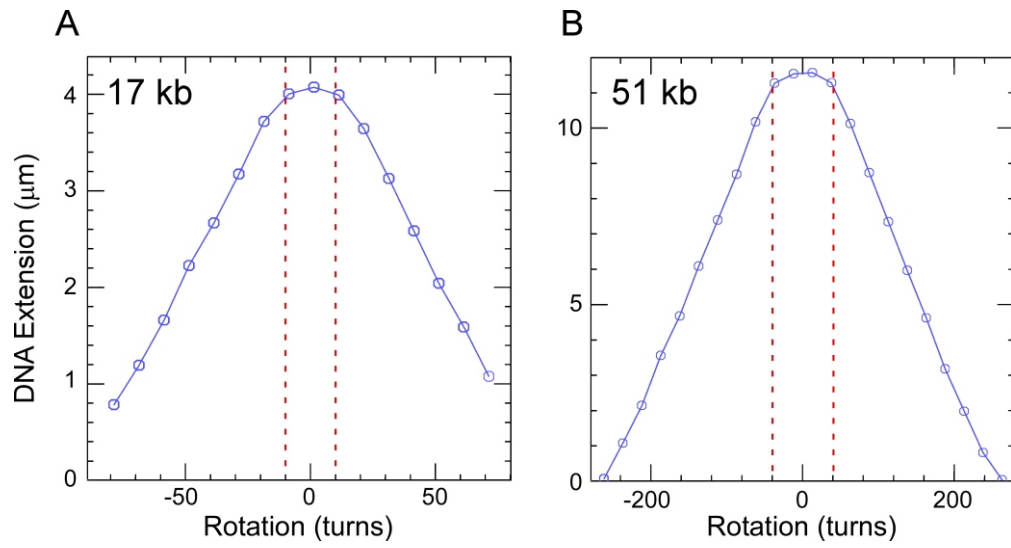

**Fig. S7** Extension vs. supercoiling curves obtained at  $F = 0.3$  pN for 17 kb and 51 kb DNA molecules. The dashed lines indicate the number of rotations for which DNA buckles and begins to form plectonemic supercoils., and correspond to  $|\sigma| \sim 0.01$  as discussed in the main text.

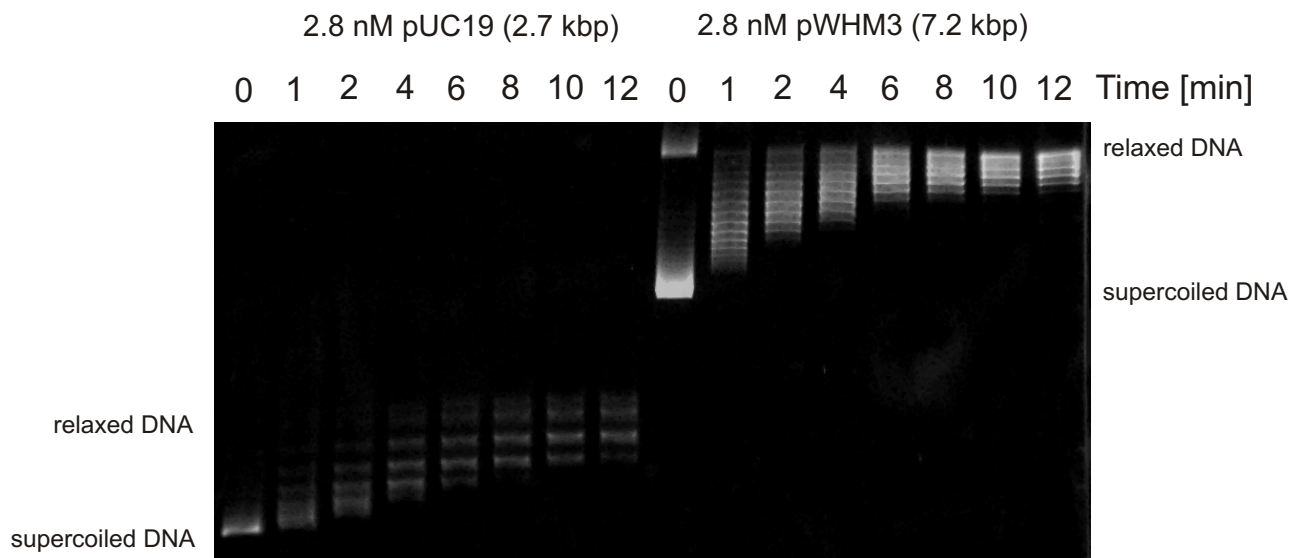

**Fig. S8** Topoisomerase activity assays. 2.8 nM concentration of negatively supercoiled plasmids pUC19 (2.7 kb) and pWHM3 (7.2 kb) were relaxed in the presence of 25 nM *ScTopA*. The reactions were stopped by addition of EDTA after 0-12 min of incubation. Products of reaction were subsequently resolved in 0.8% agarose gel and stained with ethidium bromide.
